# Supplementary material for: Sexual dimorphism and natural variation within and among species in the Drosophila retinal mosaic
Source: PubMed Central journal article supplement (PMC4268811; doi:10.1186/s12862-014-0240-x), 2014-11-26

*D. simulans* ZOM4

● Pale/OC ● Yellow ● DRA ● unknown

female

retina ID: 11

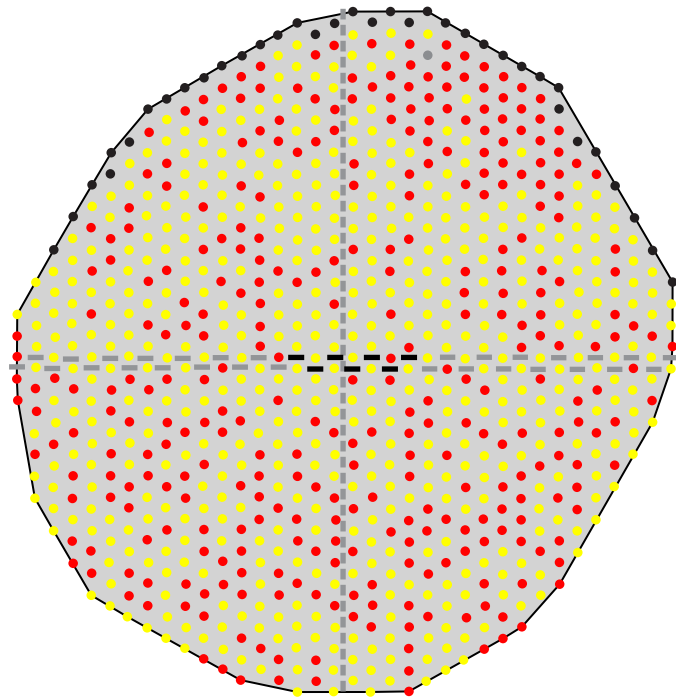

retina ID: 26

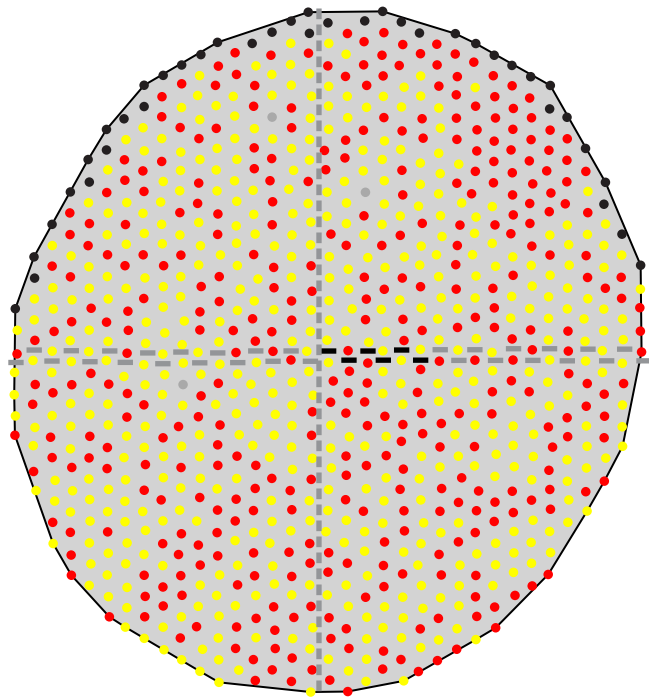

retina ID: 27

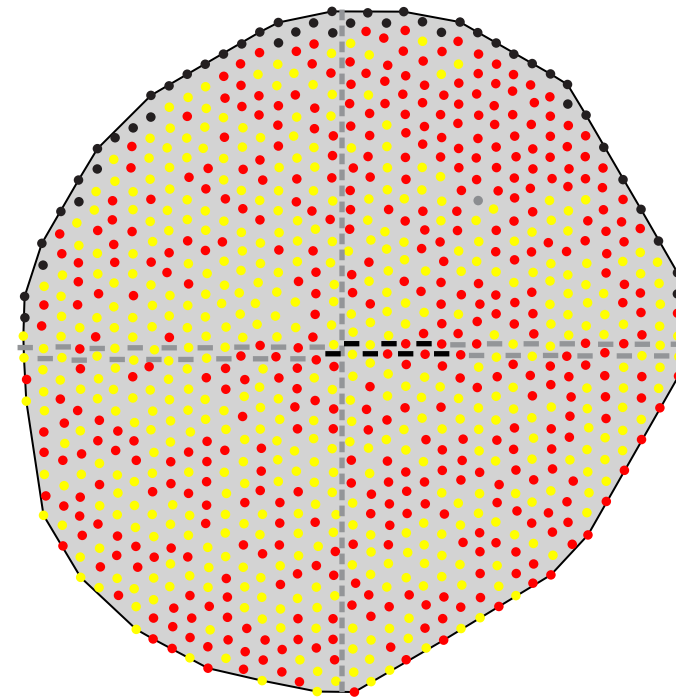

male

retina ID: 38

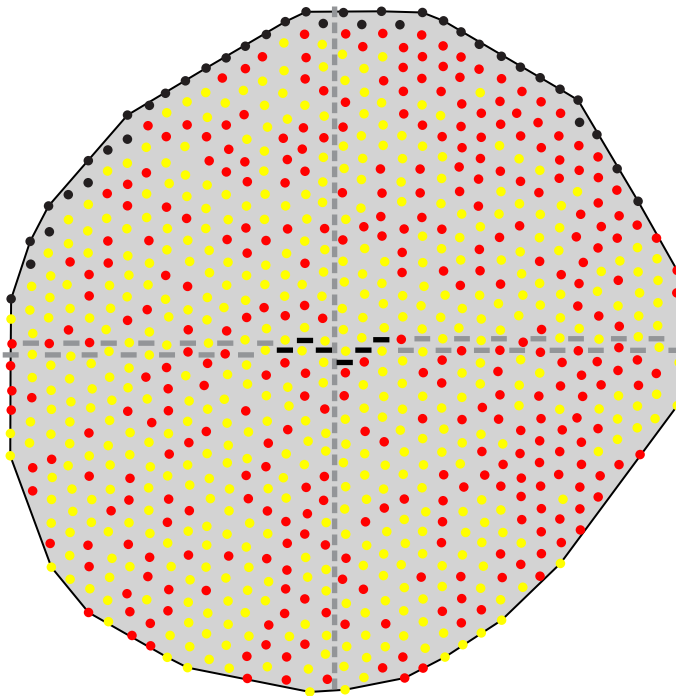

retina ID: 39

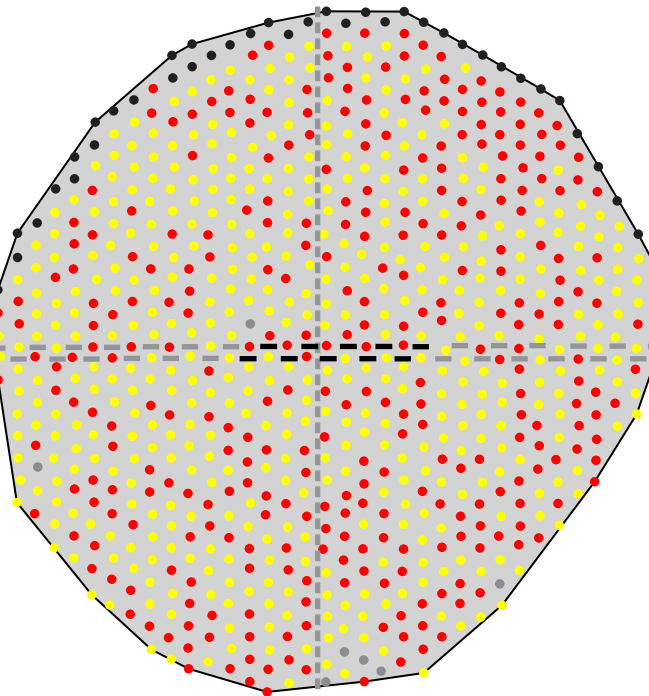

retina ID: 40

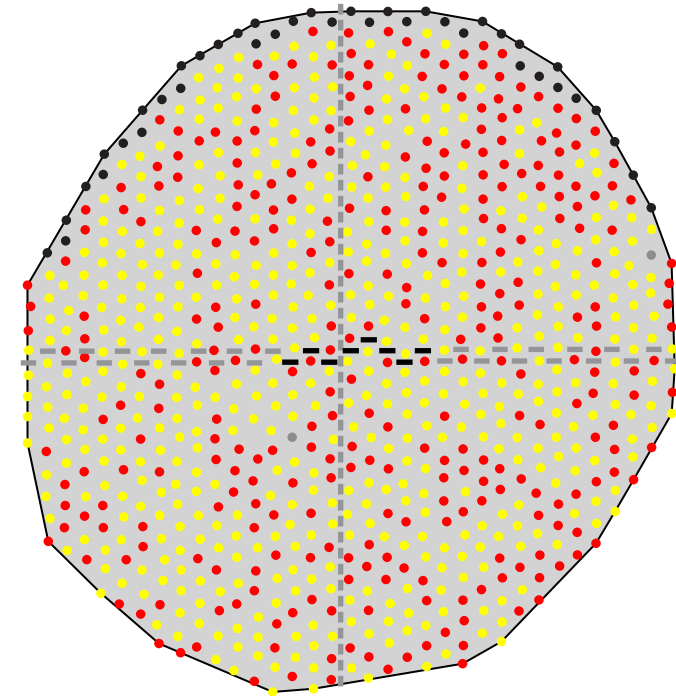

Supplement: 12862_2014_240_MOESM4_ESM.pdf [file 12862_2014_240_MOESM4_ESM.pdf]
