# Supplementary material for: Sexual dimorphism and natural variation within and among species in the Drosophila retinal mosaic
Source: PubMed Central journal article supplement (PMC4268811; doi:10.1186/s12862-014-0240-x), 2014-11-26
Supplement: 12862_2014_240_MOESM12_ESM.pdf [file 12862_2014_240_MOESM12_ESM.pdf]

**Table S5. *rh3:rh3+4* qPCR results: statistics of LMM analyses**

| <b>OreR excluded</b>                             |       |      |         | <b>OreR included</b>                             |        |      |         |
|--------------------------------------------------|-------|------|---------|--------------------------------------------------|--------|------|---------|
| REML criterion at convergence: 570.2             |       |      |         | REML criterion at convergence: 654.3             |        |      |         |
| Number of obs: 111, groups: strain, 7; biorep, 2 |       |      |         | Number of obs: 123, groups: strain, 8; biorep, 2 |        |      |         |
| Random effects:                                  |       |      |         | Random effects:                                  |        |      |         |
| Groups                                           | SD    |      |         | Groups                                           | SD     |      |         |
| strain                                           | 5.68  |      |         | strain                                           | 7.43   |      |         |
| biorep                                           | 0.35  |      |         | biorep                                           | 0.72   |      |         |
| Residual                                         | 3.01  |      |         | Residual                                         | 3.22   |      |         |
| Fixed effects:                                   |       |      |         | Fixed effects:                                   |        |      |         |
|                                                  | Est.  | SE   | t-value |                                                  | Est.   | SE   | t-value |
| (Intercept)                                      | 55.48 | 4.07 | 13.63   | (Intercept)                                      | 55.26  | 5.32 | 10.39   |
| melanogaster                                     | -8.62 | 5.73 | -1.50   | melanogaster                                     | -13.59 | 6.83 | -1.99   |
| simulans                                         | -4.68 | 5.23 | -0.90   | simulans                                         | -4.69  | 6.83 | -0.69   |
| gender: male                                     | -4.55 | 0.57 | -7.96   | gender: male                                     | -4.10  | 0.59 | -7.00   |
| Linear mixed model fit by REML [lmerMod]         |       |      |         |                                                  |        |      |         |

Formula: **Rh3Percentage ~ species + gender + (1 | strain) + (1 | biorep)**
