# Supplementary material for: Sexual dimorphism and natural variation within and among species in the Drosophila retinal mosaic
Source: PubMed Central journal article supplement (PMC4268811; doi:10.1186/s12862-014-0240-x), 2014-11-26
Supplement: 12862_2014_240_MOESM15_ESM.pdf [file 12862_2014_240_MOESM15_ESM.pdf]

**Table S7. Rhodopsin qPCR primer combinations**

| <b>target</b> | <b>fw primer</b>      | <b>rev primer</b>    | <b>species</b>     | <b>E</b> |
|---------------|-----------------------|----------------------|--------------------|----------|
| <i>rh3</i>    | CCCGGAGCCACAATGATTC   | CTTATGGCGTACACGAACGG | <i>mau,sim,mel</i> | 0.89     |
| <i>rh4</i>    | TCCTGCCGCTAACCCAGTT   | GAAGGAGCAGGACGTGAGG  | <i>mau,sim,mel</i> | 0.88     |
| <i>rh5</i>    | ACTCCGTTCGTGCTG       | GGAGCAGGTGGTCAGGAAG  | <i>mau,sim,mel</i> | 0.86     |
| <i>rh6</i>    | CATTGTATACGGATTGAGCCA | CCAGGCACGGCATCTTCTC  | <i>mau</i>         | 0.87     |
| <i>rh6</i>    | CATTGTGTACGGATTGAGCCA | CCAGGCACGGCATCTTCTC  | <i>sim</i>         | 0.88     |
| <i>rh6</i>    | CATTGTGTACGGATTGAGCCA | CCAGGCATGGCATCTTCTC  | <i>mel</i>         | 0.86     |

E: qPCR efficiency.
